# Supplementary material
Source: HighWire-hosted journal article supplement (https://www.annfammed.org/highwire/filestream/8555/field_highwire_adjunct_files/0/vanderZwaard_Supp_Apps.pdf)
Supplement: vanderZwaard_Supp_Apps.pdf [file vanderZwaard_Supp_Apps.pdf]

## Supplemental materials for:

van der Zwaard BC, van der Horst HE, Knol DL, Vanwanseele B, Elders PJ. Treatment of forefoot problems in older people: a randomized clinical trial comparing podiatric treatment with standardized shoe advice. *Ann Fam Med*. 2014;12(5):432-440.

.

## Supplemental Appendix 1

### Original version

| De schoen op het rek                                                                                                                                                                                                                                                                                                                                                                                                                                                                          | De schoen in uw hand                                                                                                                                                                                                                                                                                                                                                                                                                                                                                                                                                                                  | De schoen aan uw voet                                                                                                                                                                                                                                                                                                                                                                                                                                                                                                                            |
|-----------------------------------------------------------------------------------------------------------------------------------------------------------------------------------------------------------------------------------------------------------------------------------------------------------------------------------------------------------------------------------------------------------------------------------------------------------------------------------------------|-------------------------------------------------------------------------------------------------------------------------------------------------------------------------------------------------------------------------------------------------------------------------------------------------------------------------------------------------------------------------------------------------------------------------------------------------------------------------------------------------------------------------------------------------------------------------------------------------------|--------------------------------------------------------------------------------------------------------------------------------------------------------------------------------------------------------------------------------------------------------------------------------------------------------------------------------------------------------------------------------------------------------------------------------------------------------------------------------------------------------------------------------------------------|
|  <p>De hak is niet hoger dan 2 vingers breed.</p> <p>De schoen kan vast over de wreef met bandjes, klittenband of een veter.<br/>Een laars sluit goed aan om de enkel..</p>   <p>De zool is van rubber of een ander stroef materiaal.</p> |  <p>Als ik met mijn duim hard op de achterkant van de schoen duw dan buigt deze niet te ver in.</p>  <p>Als ik de schoen van voren en achteren naar elkaar duw dan buigt de schoen bij de bal van mijn voet en niet in het midden.</p>  <p>Als ik de neus en hak van de schoen in tegengestelde richting draai dan is de schoen niet te slap.</p> |  <p>Als ik rechtop sta is heb ik één duimbreedte over aan de voorkant van de schoen.</p>  <p>Tijdens het lopen schuift mijn voet niet naar voren. Mijn tenen puilen niet uit aan de zijkant van de schoen.</p>  <p>Als ik sta dan kunnen mijn tenen nog een beetje omhoog bewegen.</p> |

### Translation

| The shoe on display                                                                                                               | The shoe in your hand                                                                                                                                 | The shoe on your foot                                                                                  |
|-----------------------------------------------------------------------------------------------------------------------------------|-------------------------------------------------------------------------------------------------------------------------------------------------------|--------------------------------------------------------------------------------------------------------|
| The height of the heel does not exceed the width of two fingers.                                                                  | When I press on the back of the shoe with my thumb, it only bulges slightly.                                                                          | I have a thumb width between my longest toe and the front of the shoe while standing.                  |
| It is possible to tie the shoe with laces,<br>Velcro or straps over the instep of the foot.<br>A boot fits snug around the ankle. | When I try to bend the shoe by pushing the the front and back of the shoe together the shoe will bend around the ball of the foot; not in the middle. | My foot will not slide forward in the shoe during walking My toes do not protrude on the sides either. |
| The outer sole is made of rubber or another high friction material.                                                               | If I twist the front and the back of the shoe in opposite directions, the shoe will not be too flexible.                                              | While standing, my toes have room enough to wiggle within the shoe.                                    |

**De 9 stappen checklist**
**GOEDE SCHOENEN KOPEN**

**De beste schoen koopt u aan het einde van de dag!**

**De schoen op het rek**

- Is de hak niet te hoog?
- Sluit de schoen over de wreef?
- Is de zool niet te glad?

**De schoen in uw hand**

- Is de schoen rond de hiel stevig?
- Buigt de schoen bij de bal?
- Is de zool niet te slap?

**De schoen aan uw voet**

- Is de schoen een duimdikte langer dan de voet?
- Is de schoen breed genoeg zonder te schuiven?
- Hebben de tenen genoeg ruimte omhoog?

Deze folder werd mede mogelijk gemaakt door:



Research for Health and Care Research

VU medisch centrum 

 **Fontys**  
Hogescholen

 **ZonMw**



**WAAR MOET U OP LETTEN?**

## Translation

**Checklist in 9 steps**

The best shoes are bought at the end of the day!

The shoe on display

- Is the heel not too high?
- Does the shoe fasten over the instep?
- Is the outer sole non slippery?

The shoe in your hand

- Is the back of the shoe sturdy?
- Does the shoe bend around the ball of the foot?
- Is the sole not too flexible?

The shoe on your foot

- Is the shoe a thumbs' width longer than your foot?
- Is the shoe wide enough without sliding forward?
- Do the toes have enough room to wiggle?

**Buying good shoes**

This leaflet has been developed and made possible by:

What do you have to take notice of?

## Supplemental Appendix 2

| GP Practice ID | Practice size* | Practice characteristics |        |     |     |                     |             |
|----------------|----------------|--------------------------|--------|-----|-----|---------------------|-------------|
|                |                | Gender                   |        | Age |     | Allocation          |             |
|                |                | Male                     | Female | ≤74 | ≥75 | Podiatric treatment | Shoe advice |
| 10             | Medium         | 1                        | 17     | 13  | 5   | 10                  | 8           |
| 11             | Small          | 3                        | 14     | 13  | 4   | 11                  | 6           |
| 12             | Small          | 3                        | 4      | 6   | 1   | 4                   | 3           |
| 13             | Medium         | 1                        | 11     | 11  | 1   | 8                   | 4           |
| 14             | Small          | 1                        | 5      | 6   | 0   | 2                   | 4           |
| 15             | Medium         | 3                        | 6      | 8   | 1   | 2                   | 7           |
| 16             | Small          | 3                        | 11     | 11  | 3   | 8                   | 6           |
| 18             | Medium         | 3                        | 11     | 14  | 0   | 5                   | 9           |
| 19             | Medium         | 6                        | 22     | 24  | 4   | 16                  | 12          |
| 30             | Large          | 3                        | 5      | 6   | 2   | 3                   | 5           |
| 31             | Large          | 7                        | 9      | 16  | 0   | 8                   | 8           |
| 32             | Medium         | 4                        | 18     | 21  | 1   | 10                  | 12          |
| 33             | Small          | 1                        | 2      | 3   | 0   | 2                   | 1           |
| 40             | Large          | 7                        | 23     | 24  | 6   | 13                  | 17          |
| 60             | Small          | 0                        | 1      | 1   | 0   | 0                   | 1           |

\*Practice size: small is <5000 patients, medium is 5.000-10.000 patients and large is >10.000 patients
